# Supplementary material for: Porous nickel and cobalt hexanuclear ring-like clusters built from two different kind of calixarene ligands – new molecular traps for small volatile molecules
Source: Royal Society of Chemistry journal article supplement (doi:10.1039/d1ce01361k), 2021-11-26
Supplement: d1ce01361k1.pdf [file d1ce01361k1.pdf]

## Porous nickel and cobalt hexanuclear ring-like clusters built from two different kind of calixarene ligands - new molecular traps for small volatile molecules

Mariia V. Kniazeva,<sup>a</sup> Alexander S. Ovsyannikov,<sup>a\*</sup> Beata Nowicka,<sup>b</sup> Nathalie Kyritsakas,<sup>c</sup> Aida I. Samigullina,<sup>a</sup> Aidar T. Gubaidullin,<sup>a</sup> Daut R. Islamov,<sup>d</sup> Pavel V. Dorovatovskii,<sup>e</sup> Elena V. Popova,<sup>a</sup> Sofiya R. Kleshnina,<sup>a</sup> Svetlana E. Solovieva,<sup>b</sup> Igor S. Antipin,<sup>b</sup> Sylvie Ferlay<sup>c\*</sup>



**Figure S1.** C-H- $\pi$  interactions between crystallization DMF molecules (light green) and calixarene aromatic rings in  $(2-2H)_2Co_6$ . No interactions are observed for the molecules located in the internal channels (N6).

view along:  $a$  axis



$c$  axis



**Figure S2.** Visualization of the solvent-accessible voids for  $(2-2H)_2\cdot 3_2Co_6$  and  $(2-2H)_2\cdot 3_2Ni_6$ . The view presents structure fragment of  $2 \times 2 \times 2$  unit cells. In the view along the  $a$ -axis (left) four internal channels are visible at the center of each cell, while the external channels are visible between the unit cells. The view along the  $c$ -axis (right) shows the intersection of the external channels and the separated capsules formed by calixarene cavities.

---



**Figure S3.** For air-dried  $(2-2H)_2\text{3}_2\text{Co}_6$  and  $(2-2H)_2\text{3}_2\text{Ni}_6$ , comparison of the simulated and experimental powder X-Ray diffraction studies (PXRD) diagrams at a scan step size of  $2^\circ \text{ min}^{-1}$ .



**Figure S4.** For  $(2-2H)_2\text{3}_2\text{Co}_6$  and  $(2-2H)_2\text{3}_2\text{Ni}_6$  TGA traces recorded between  $36 - 450^\circ\text{C}$  at a rate of  $10^\circ/\text{mn}$ .



**Figure S5.** PXRD patterns for air-dried (green), totally desolvated (red) and hydrated (blue) samples of  $(2-2H)_23_2Ni_6$  compared to simulated one, showing anisotropic peak shifts due to lattice structural variations imposed by the structural adaptation to the guest molecules exchange.



**Figure S6.**  $N_2$  sorption isotherms at 77K for  $(2-2H)_23_2Co_6$  and  $(2-2H)_23_2Ni_6$ .



**Figure S7.** Sorption isotherms for  $(2-2H)_232Ni_6$  measured by the gravimetric dynamic vapor sorption method at 25°C in the  $p/p_0$  range of a) 0-98% ( $H_2O$ ), b) 0-80% ( $CH_3C(O)CH_3$ ), c) 0-90% (EtOH), d) 0-95% (MeOH).



**Figure S8.** SEM images of the microcrystalline samples of  $(2-2H)_232Co_6$  (left) and  $(2-2H)_232Ni_6$  (right).



Figure S9. Repeated water sorption and desorption cycles for  $(2-2H)_23Co_6$ .



Figure S9. IR-spectrum of  $(3-4H)$ ,  $(2-4H)$ ,  $(2-2H)_23Ni_6$  and  $(2-2H)_23Co_6$ .
